# Supplementary material for: Engineering Sensory Ganglion Multicellular System to Model Tissue Nerve Ingrowth
Source: PubMed Central journal article supplement (PMC10953573; doi:10.1002/advs.202308478), 2023-12-19
Supplement: ADVS-11-2308478-s002.pdf [file ADVS-11-2308478-s002.pdf]

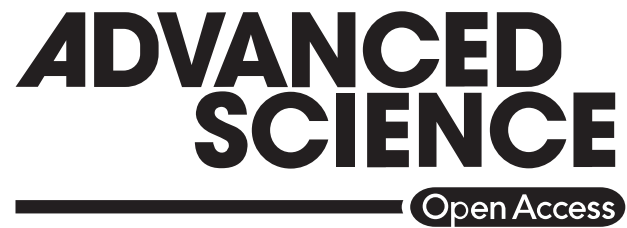

## Supporting Information

for *Adv. Sci.*, DOI 10.1002/adv.202308478

Engineering Sensory Ganglion Multicellular System to Model Tissue Nerve Ingrowth

*Junxuan Ma, Janick Eglauf, Sibylle Grad, Mauro Alini and Tiziano Serra\**

Supporting Information

# **Engineering Sensory Ganglion Multicellular System to Model Tissue Nerve Ingrowth**

*Junxuan Ma, Janick Eglauf, Sibylle Grad, Mauro Alini, Tiziano Serra*

J. Ma, J. Eglauf, S. Grad, M. Alini, T. Serra

AO Research Institute, Clavadelerstrasse 8, Davos, 7270, Switzerland

J. Eglauf

ETH Zürich, Rämistrasse 101, 8092, Zürich, Switzerland

T. Serra

Complex Tissue Regeneration Department, MERLN Institute for Technology-Inspired  
Regenerative Medicine, Maastricht University, Netherlands

E-mail: [Tiziano.Serra@aofoundation.org](mailto:Tiziano.Serra@aofoundation.org)

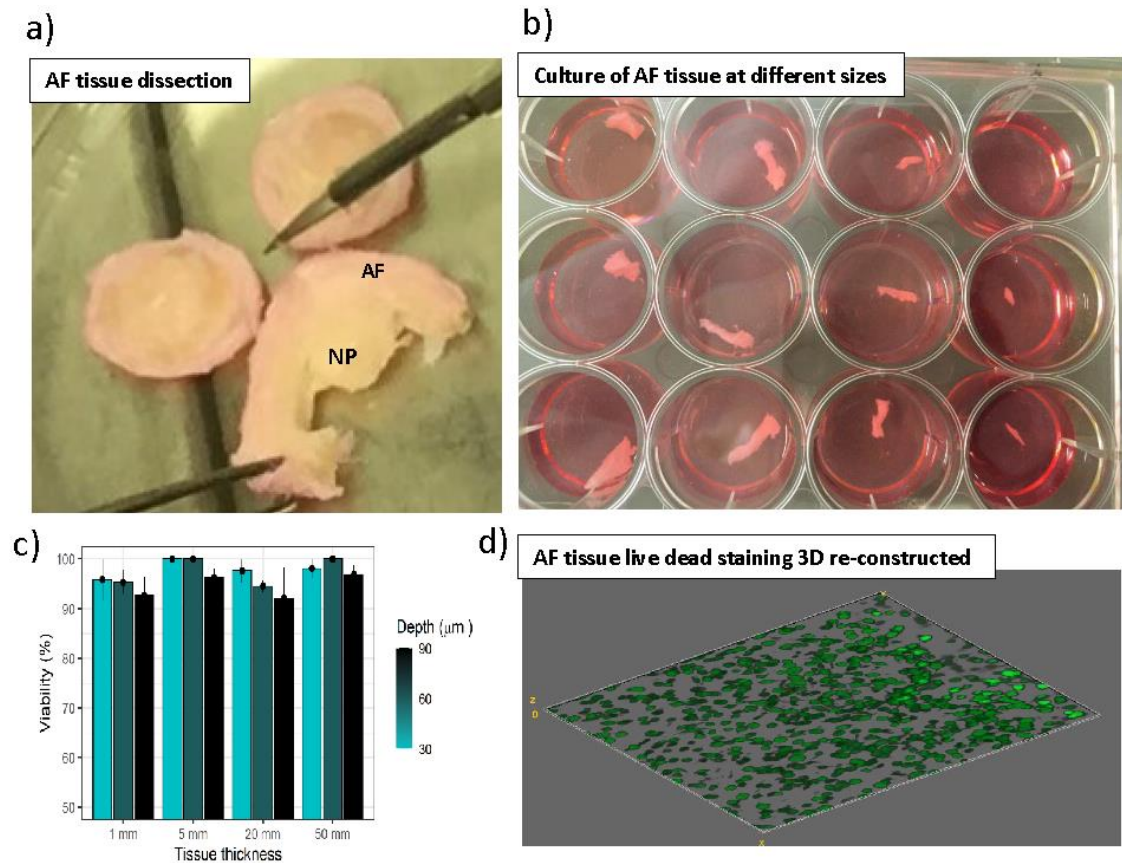

**Figure S1.** The culture of AF tissue explant. **a)** Dissection of AF tissue. **b)** Outer AF tissues are trimmed into different sizes for culture. **c)** The live dead staining of AF tissue after 9 days of culture shows a viability higher than 90% and this is not influenced by the trimming size of the explant. **d)** 3D reconstruction of confocal z-stack images of the live-dead-staining AF cells to 90 μm depth from the surface of AF explant.

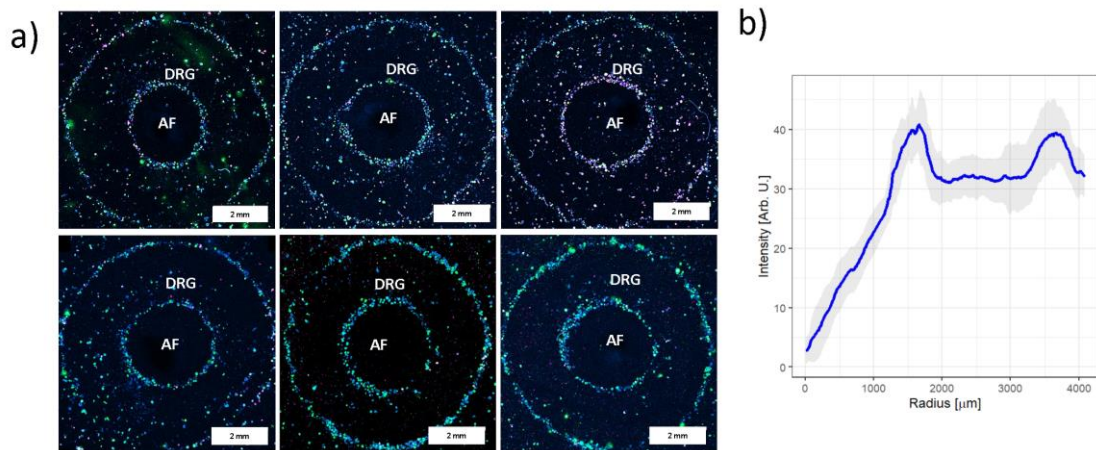

**Figure S2.** Geometry of the hydrodynamic patterning. **a)** Six experiments showing the consistency of the patterned DRG multicellular system. These are tiled immunofluorescence images labelling NF200 (green), CGRP (purple) and nuclei (blue). **b)** Radial profile of the patterned cellular geometry evaluated as in Di Marzio *et al.*<sup>[1]</sup> The 2 peaks represent the 2 rings, and the width of the peaks indicates the ring thickness. The x-axis location of the peaks shows diameter of the rings. Grey stratum represents standard deviation among different experiments.

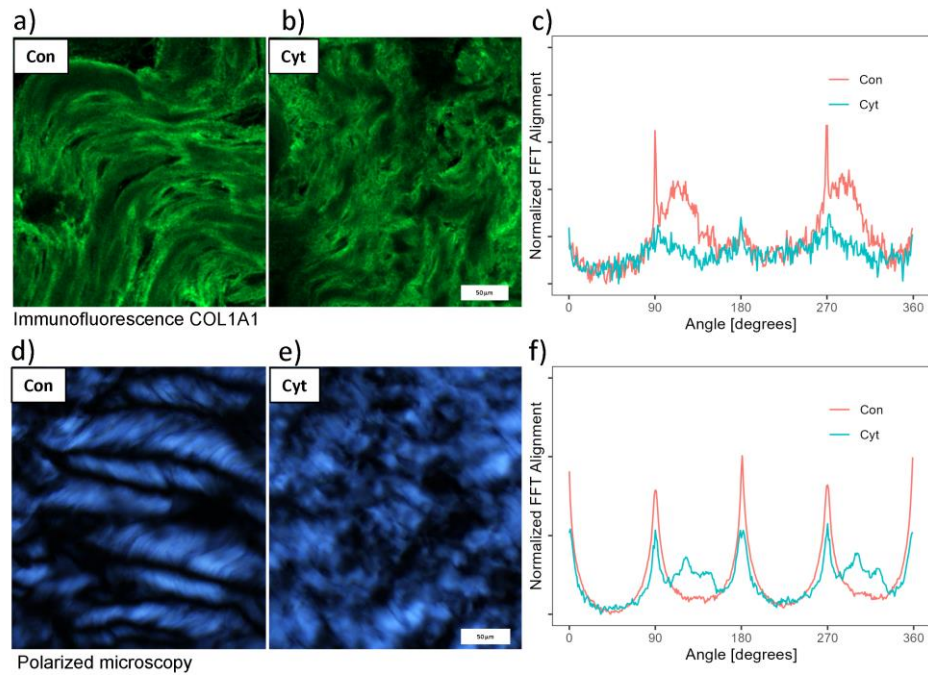

**Figure S3.** Effect of cytokines on extracellular matrix organisation of AF tissue. **a-b)** Immunofluorescence staining of collagen type I (COL1A1) in the 10  $\mu\text{m}$  thick cryosection of AF tissue without (Con) and with (Cyt) cytokine priming. **c)** Fast Fourier Transform (FFT) analysis of the collagen fibre alignment in the immunofluorescence images. **d-e)** Polarised light imaging in the cryosection of AF tissues. **f)** FFT analysis of the extracellular matrix alignment in the polarised light imaging.

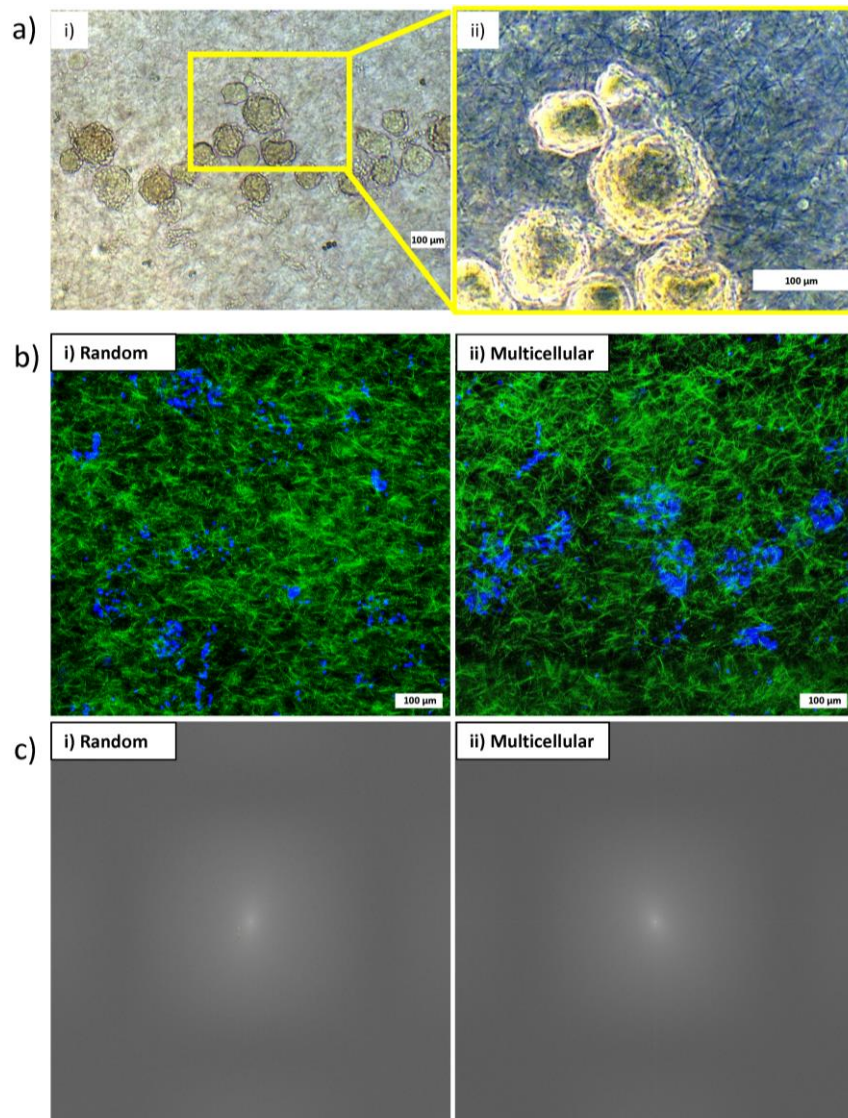

**Figure S4.** Collagen fibres in the collagen matrix-based hydrogel surrounding neurons. **a)** Phase contrast images of collagen surrounding the multicellular system. **b)** Immunofluorescence staining of collagen fibres around random and multicellular cells. Green channel is the collagen staining; blue channel is the DAPI staining of nuclei. **c)** Fast Fourier transformation of the collagen-stained images (green channels). No anisotropic orientation is observed.

**Table S1.** Donor information of bovine annulus fibrosus tissues (AF) and bovine dorsal root ganglion tissues (DRG)

| Donor ID                        | Sex    | Age (month) | Weight (kg) | Tissue Type |
|---------------------------------|--------|-------------|-------------|-------------|
| #1 Random <sup>a)</sup>         | Female | 12          | 200         | AF          |
| #2 Random                       | Male   | 10          | 190         | AF          |
| #3 Random                       | Male   | 10          | 190         | AF          |
| #4 Random                       | Male   | 10          | 190         | AF          |
| #5 Random                       | Male   | 6           | 148         | AF          |
| #6 Random                       | Male   | 12          | 200         | AF          |
| #7 Random                       | Male   | 12          | 192         | AF          |
| #8 Random                       | Male   | 5           | 136         | AF          |
| #9 Random                       | Male   | 10          | 235         | AF          |
| #10 Random                      | Male   | 10          | 167         | AF          |
| #11 Random                      | Female | 10          | 125         | AF          |
| #12 Random                      | Male   | 11          | 240         | DRG         |
| #13 Random                      | Male   | 10          | 210         | DRG         |
| #14 Random                      | Male   | 12          | 204         | DRG         |
| #15 Random                      | Male   | 12          | 204         | DRG         |
| #16 Random                      | Male   | 10          | 167.4       | DRG         |
| #17 Random                      | Male   | 9           | 142.4       | DRG         |
| #17 Multicellular <sup>b)</sup> | Male   | 13          | 230         | AF          |
| #18 Multicellular               | Male   | 12          | 235         | AF          |
| #19 Multicellular               | Female | 13          | 244         | AF          |
| #20 Multicellular               | Female | 8           | 180         | AF          |
| #21 Multicellular               | Female | 6           | 132         | DRG         |
| #22 Multicellular               | Female | 10          | 169.8       | DRG         |

<sup>a)</sup> Random: the DRG tissue units seeded randomly around AF without assembling; <sup>b)</sup> sound-assembled DRG into multicellular system around AF.

## References

- [1] N. Di Marzio, P. Ananthanarayanan, A. G. Guex, M. Alini, C. Riganti, T. Serra, *Materials Today Bio* **2022**, *16*, 100357, <https://doi.org/10.1016/j.mtbio.2022.100357>.
